# Supplementary material
Source: publisher site journal article supplement (https://www.spandidos-publications.com/4757/downloadSupplementary)

Figure S1. Effect of EA on cell migration and the expression levels of cell cycle-related proteins. (A and B) Western blot analysis of the epithelial-mesenchymal transition-related protein N-cadherin, fibronectin and ZEB1 in MHCC97-L and HCCLM3 cells. (C and D) Western blot analysis of the cell cycle-related proteins cyclin D1 and CDK4 in MHCC97-L and HCCLM3 cells.  $\beta$ -actin was used as a control. All data were shown as the mean  $\pm$  SD. \* $P$ <0.05, \*\* $P$ <0.01, \*\*\* $P$ <0.001. EA, eupalinolide A.

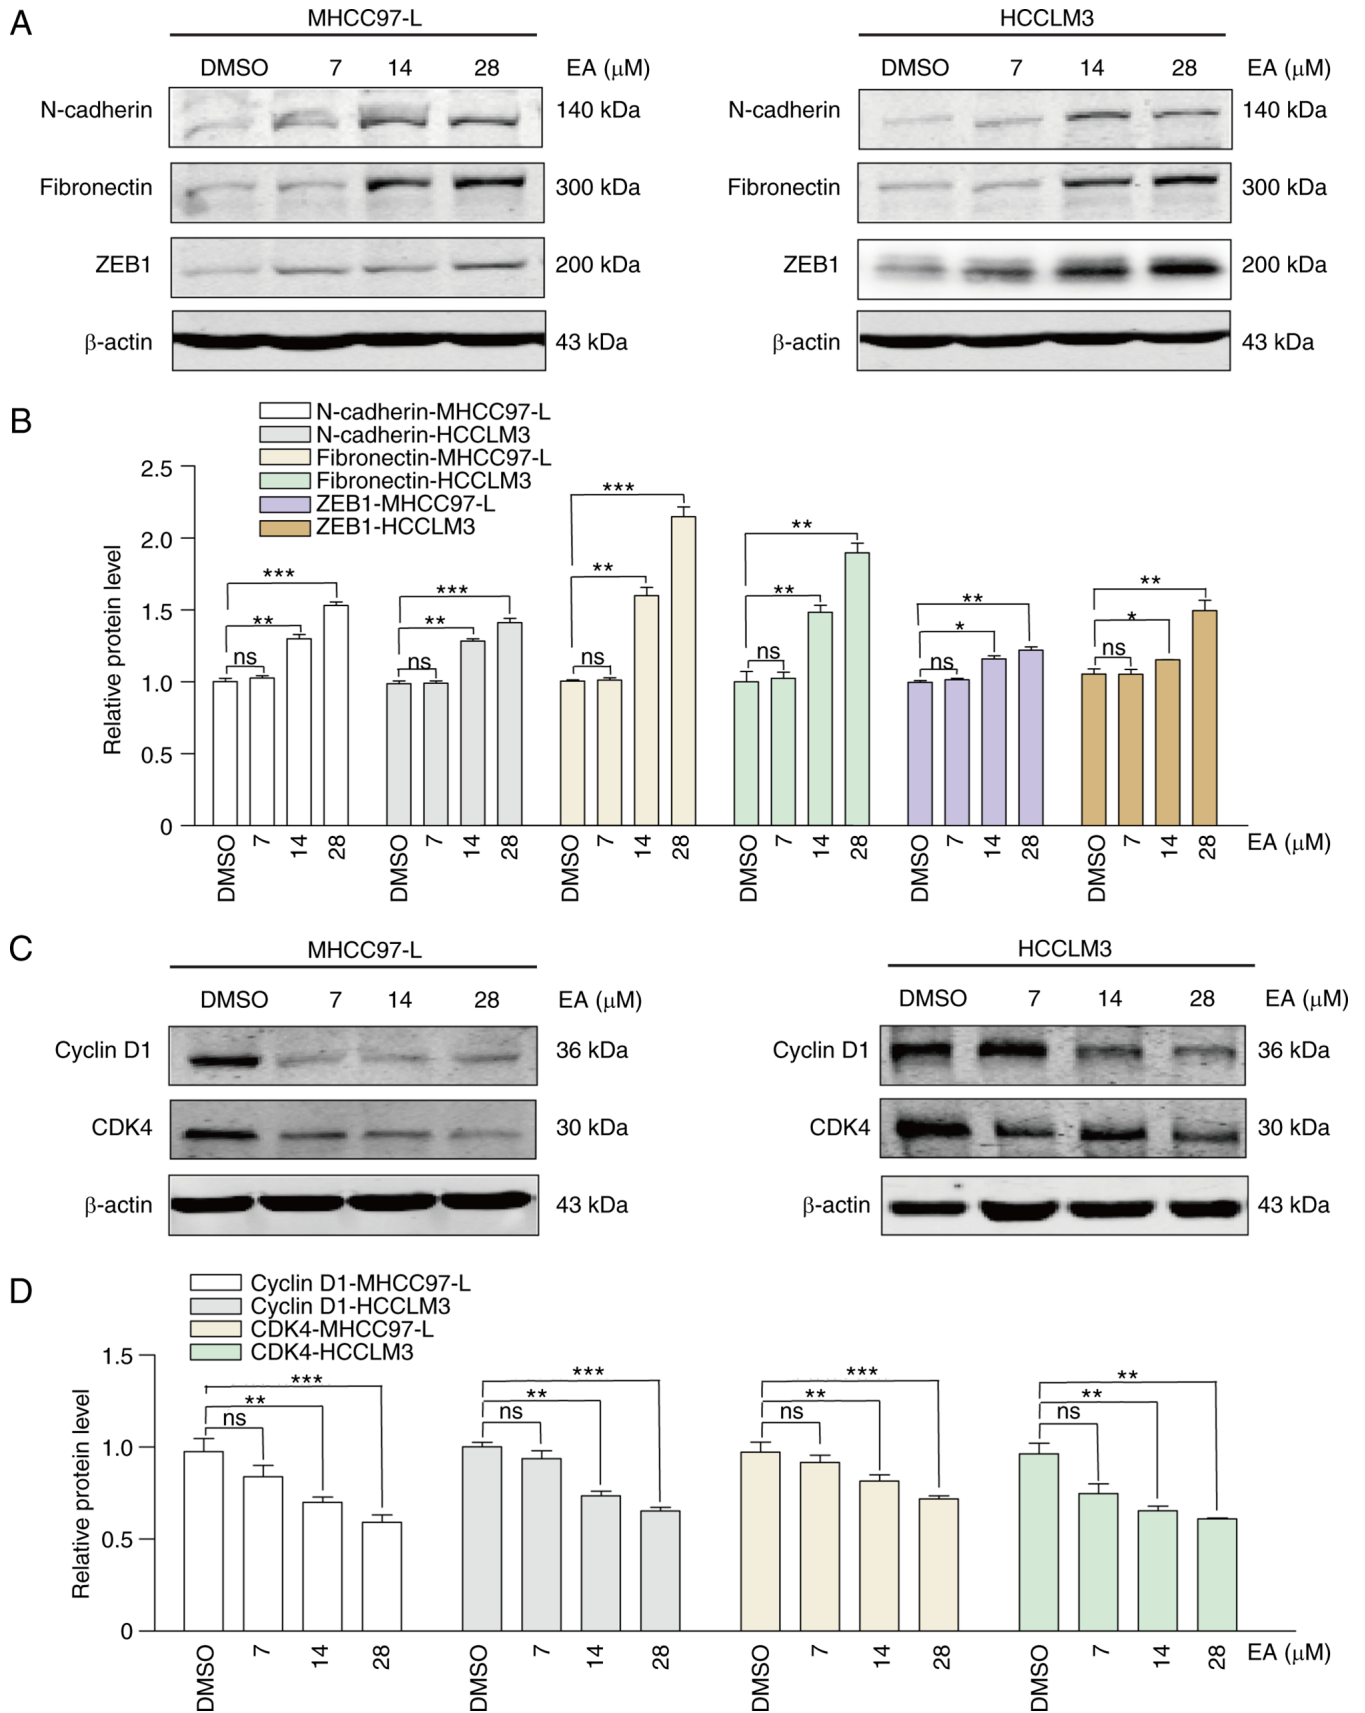

Figure S2. Statistical analysis of western blotting of MAPK signaling proteins in MHCC97-L and HCCLM3 cells, and the  $IC_{50}$  of EA in MHCC97-L and HCCLM3 cells. (A) Semi-quantification of the western blot analysis of the MAPK-related proteins in MHCC97-L and HCCLM3 cells.  $\beta$ -actin was used as a control. All data are presented as the mean  $\pm$  SD. \*\*\* $P$ <0.001. (B)  $IC_{50}$  of EA in MHCC97-L and HCCLM3 cells, as determined by Cell Counting Kit 8 assay. EA, eupalinalide A; p-, phosphorylated.

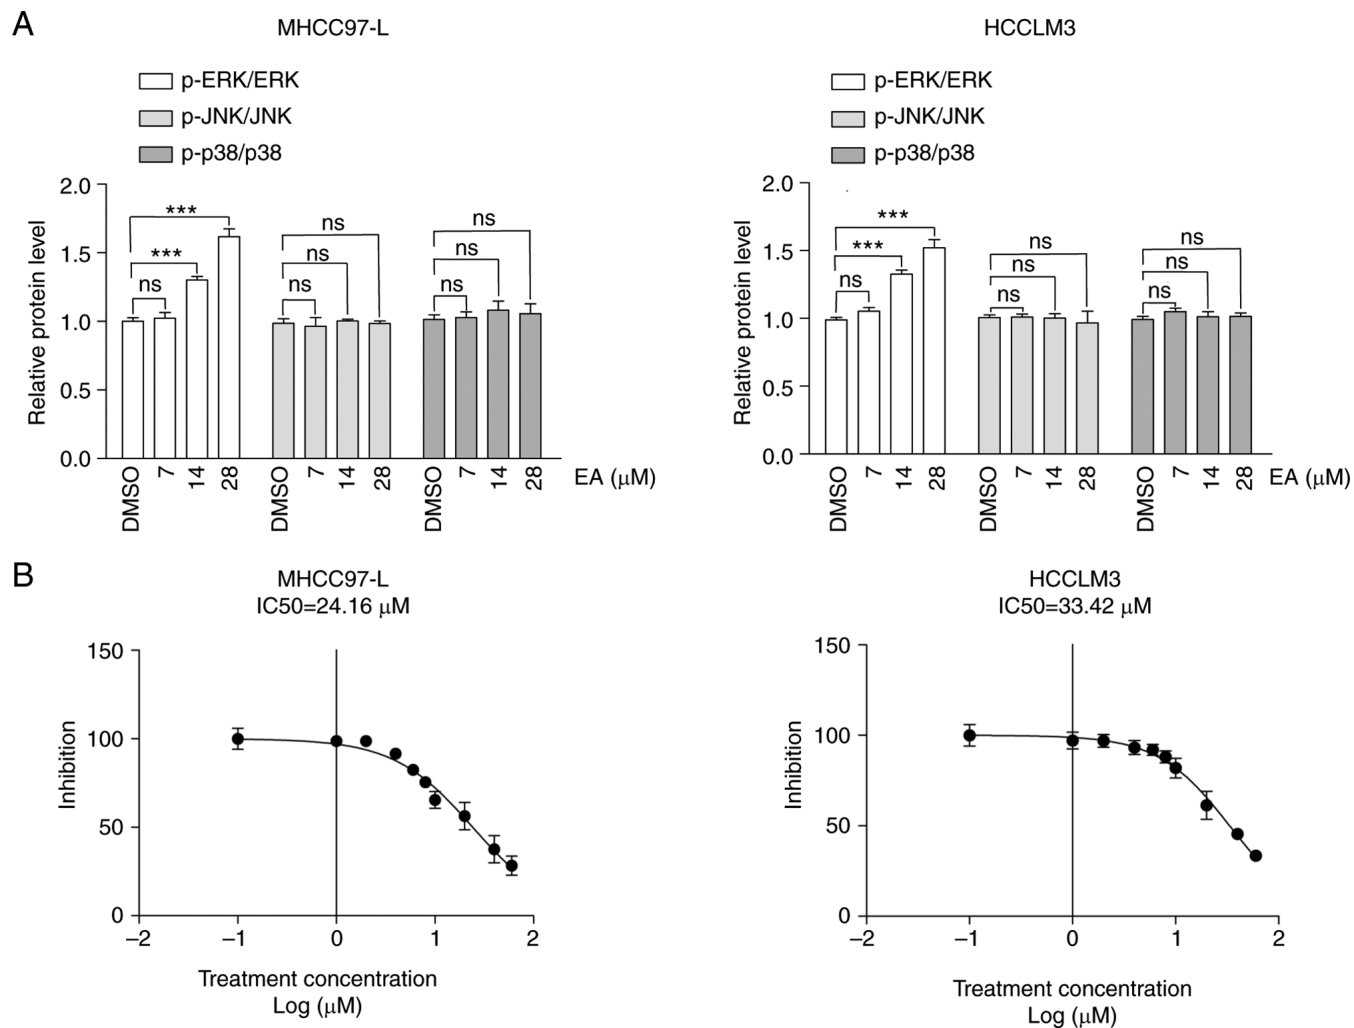

Supplement: Supplementary file 1 [file downloadSupplementary]
